# Supplementary material for: Tiling resolution array CGH and high density expression profiling of urothelial carcinomas delineate genomic amplicons and candidate target genes specific for advanced tumors
Source: Springer Nature journal article supplement (doi:10.1186/1755-8794-1-3), 2008-01-31
Supplement: Additional file 5 [file 1755-8794-1-3-s5.doc]

**Supplementary table 3.** Summary of homozygous deletionsa,b

| **Cytogenetic region** | **Mb start position (BAC)** | **Mb end position (BAC)** | **STS**b | **Size (Mb)** | **Genes** | **No. cases** |
| --- | --- | --- | --- | --- | --- | --- |
| 4q35 | 189.46 (RP11-156B8) | 189.76 (CTD-2314A8) | SHGC-140848 | 0.30 | *FLJ25801, FLJ36180* | 1 |
| 9p24 | 0.24 (RP11-393D13) | 0.86 (RP11-696A8) |  | 0.62 | *DOCK8, LOC645586, LOC642350, ANKRD15, DMRT1* | 1 |
| 9p23 | 13.12 (RP11-173M6) | 14.53 (RP11-713D18) | SHGC-140269 | 1.41 | *MPDZ, NFIB, LOC646181, FLJ41200,*  *LOC646206, LOC646211, LOC347193, LOC138864,* | 1 |
| 9p21c | 21.75 (RP11-615P15) | 22.15 (RP11-467K20) | SHGC-9726 | 0.40 | *MTAP, CDKN2A, CDKN2B* | 12 |
| 9q21 | 74.84 (RP11-714O6) | 75.18 (RP11-715L22) | SHGC-82463 | 0.34 | *OSTF1, NRK1, C9orf41, C9orf40* | 2 |
| 9q22 | 92.76 (RP11-612N7) | 93.87 (RP11-275N7) | SHGC-130828 | 1.11 | *FGD3, SUSD3, BINCA, NINJ1, WNK2,*  *C9orf10OS, C9orf10, PHF2, BARX1* | 1 |
| 9q33b | 122.86 (RP11-102I1) | 124.10 (RP11-160B11) | SHGC-130269 | 1.24 | *RABGAP1, GPR21, STRBP, CRB2, DENND1A, LHX2, NEK6, PSMB7* | 1 |
| 10q26b | 134.20 (RP13-502M1) | 134.53 (RP11-33G5) |  | 0.33 | *NKX6-2* | 1 |
| 13q14 | 47.90 (RP11-115I22) | 50.40 (RP11-686G10) |  | 2.50 | *RB1, RCBTB2, CYSLTR2, FNDC3A, CDADC1, MLNR, CAB39L, RCBTB1, SETDB2, PHF11, CAB39L, RCBTB1, ARL11, EBPL, KPNA3, C13orf1, KCNRG, DLEU2, RFP2, DELEU1, DLEU2,FAM10A4, DLEU7, FLJ11712* | 1 |
| 21q21 | 16.03 (RP11-268F23) | 17.63 (RP11-486H22) |  | 1.60 | *USP25, VDAC2P, C21orf34* | 1 |

aMapping data is based on the UCSC genome browser (May 2004 freeze)

bSTS markers used for verification.

cRegions where not all cases passed the defined threshold for homozygous deletions, but where a manual data review strongly suggested loss of both alleles.
